# Supplementary material for: Should Peak Dose Be Used to Prescribe Spatially Fractionated Radiation Therapy?—A Review of Preclinical Studies
Source: MDPI journal article supplement (doi:10.3390/cancers14153625), 2022-07-26
Supplement: s1 [file s1]

## Index of Correlation Matrices:

|    |                          |   |
|----|--------------------------|---|
| 1. | ALL (MRT + MBRT)         | 1 |
| 2. | MRT                      | 2 |
| 3. | MBRT                     | 3 |
| 4. | MRT (brain Tumors only)  | 4 |
| 5. | MBRT (brain tumors only) | 5 |
| 6. | Proton MBRT              | 6 |
| 7. | Photon MBRT              | 7 |

### 1. ALL (MRT + MBRT)

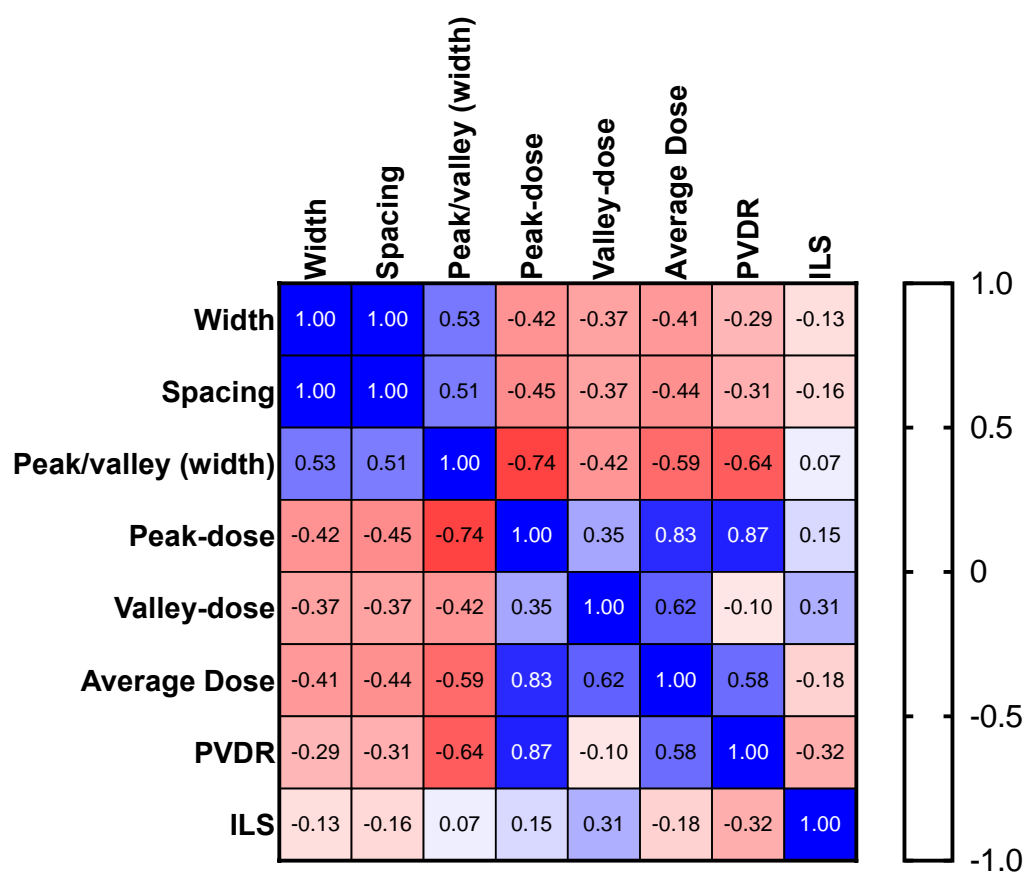

**Correlation matrix of ALL (MRT+MBRT)**

2. MRT

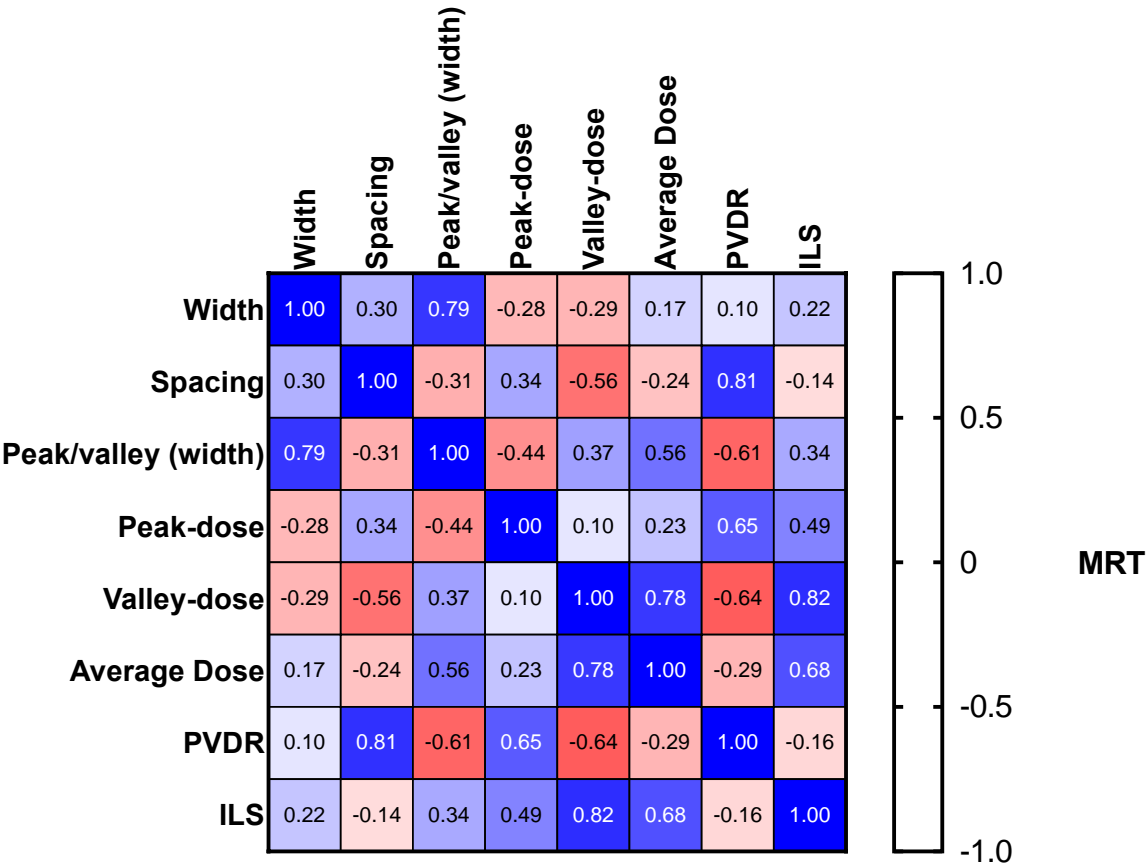

Correlation matrix of MRT

### 3. MBRT (protons and photons)

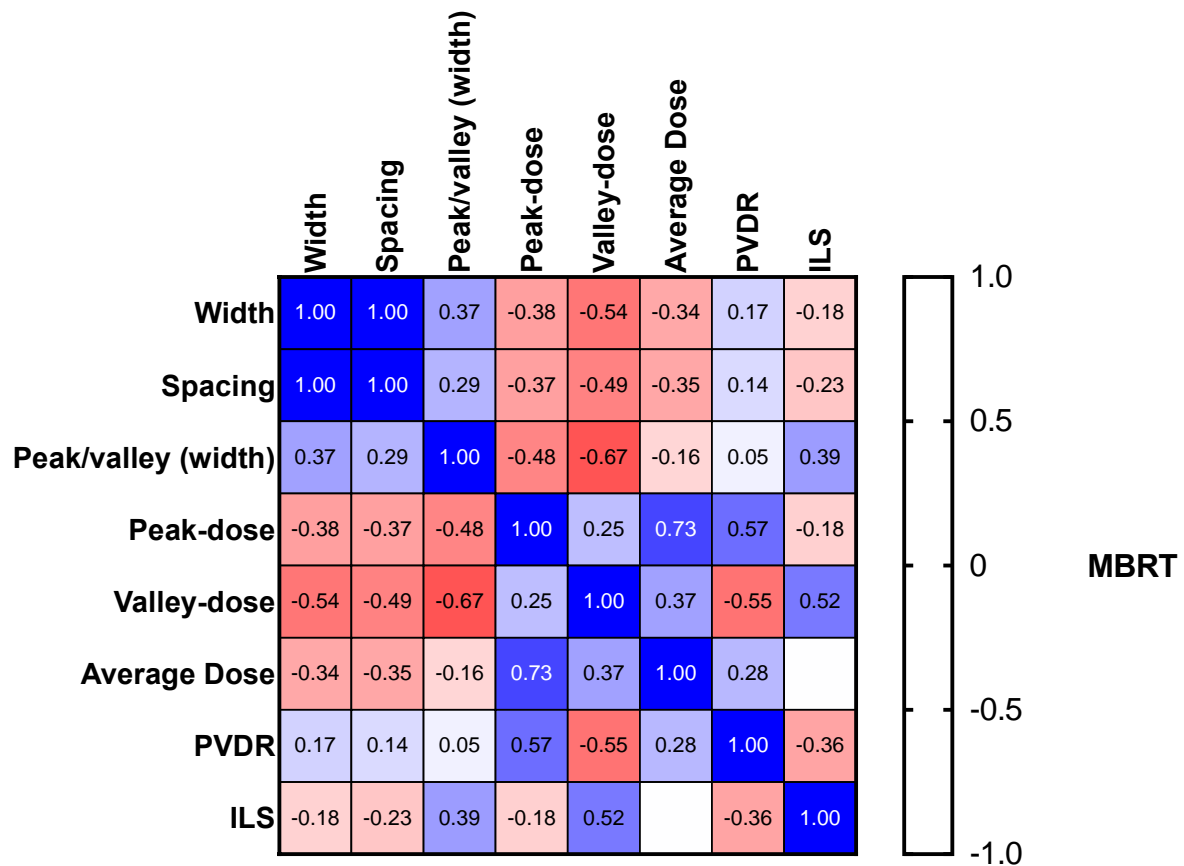

**Correlation matrix of MBRT  
(proton & photons)**

#### 4. MRT (brain Tumors only)

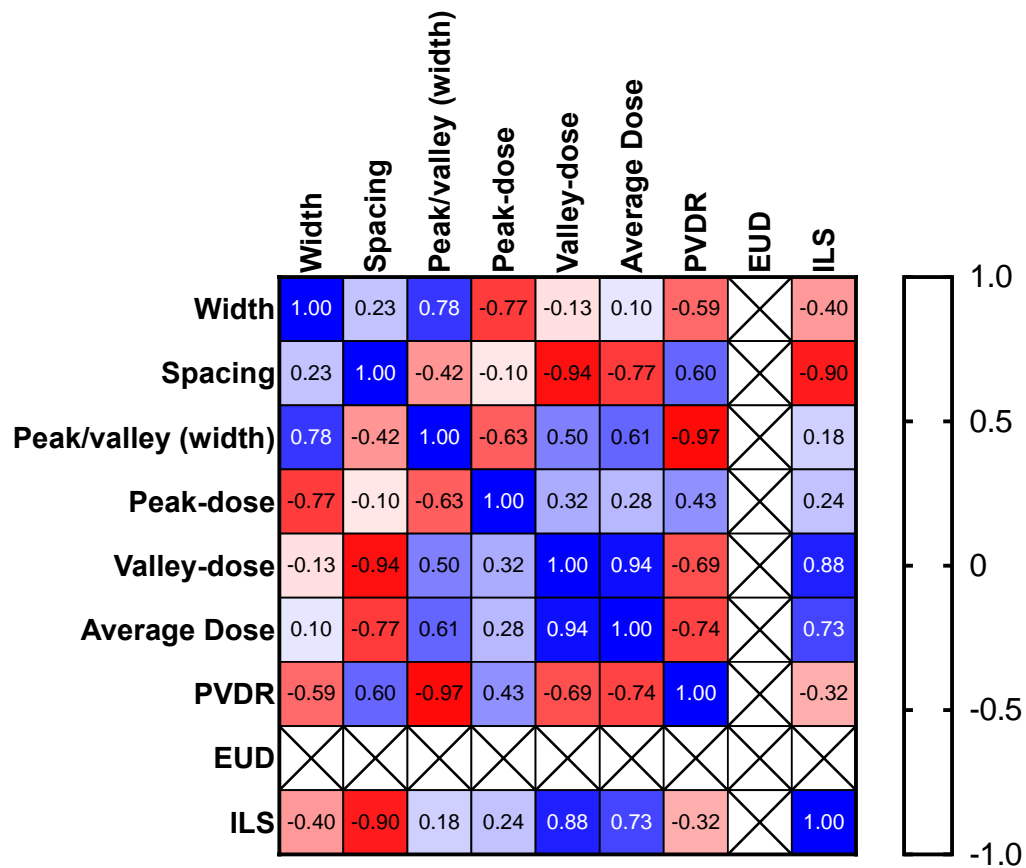

**Correlation matrix of brain tumors in MRT**

## 5. MBRT (brain tumors only)

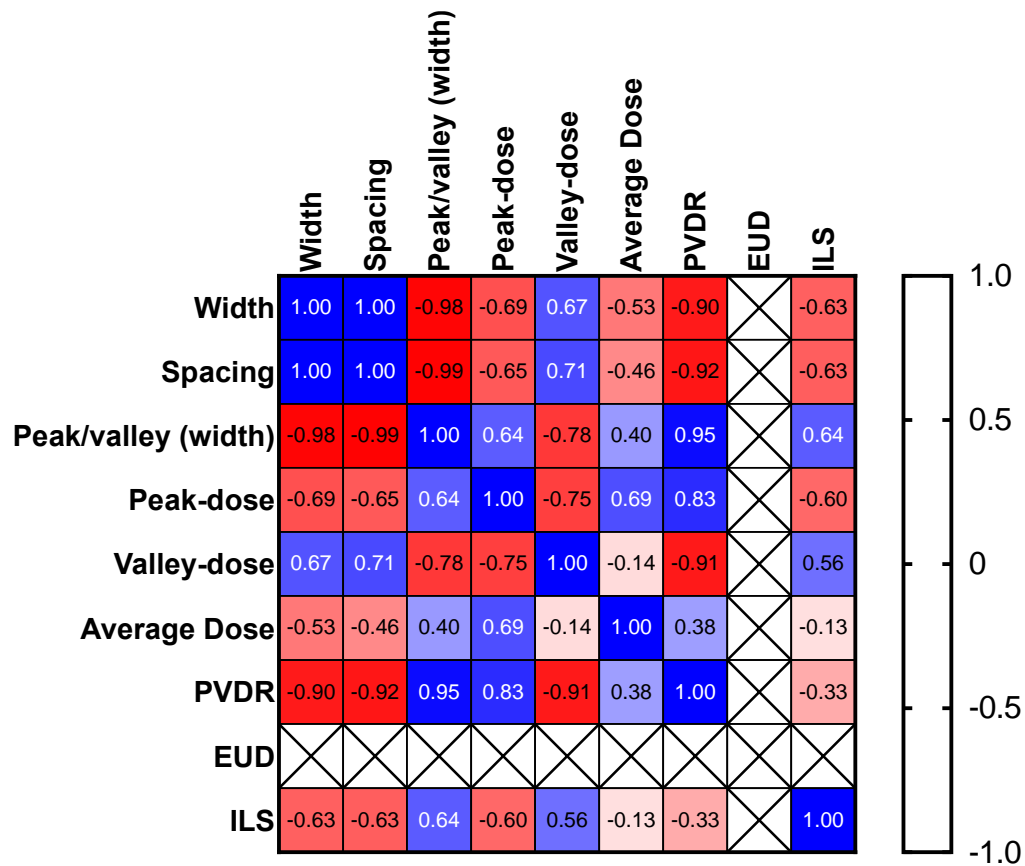

**Correlation matrix of Brain tumors in MBRT  
(protons and photons)**

6. Proton MBRT

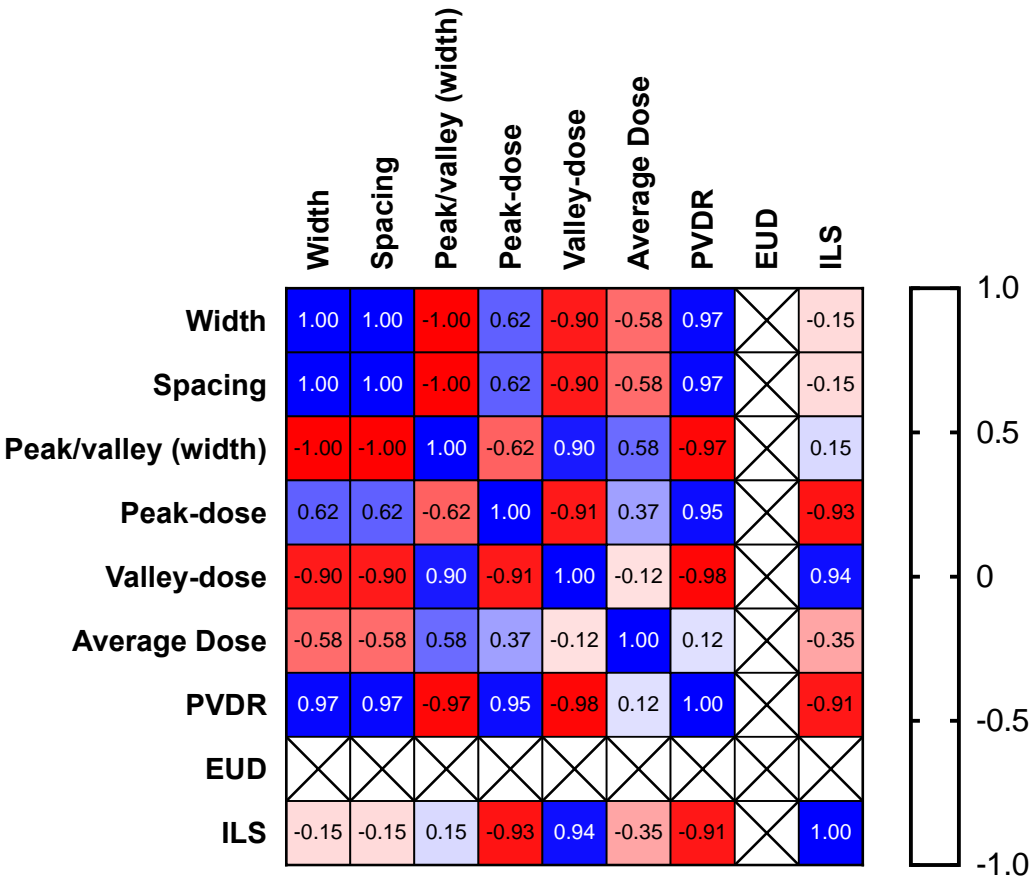

Correlation matrix of proton MBRT

7. Photon MBRT

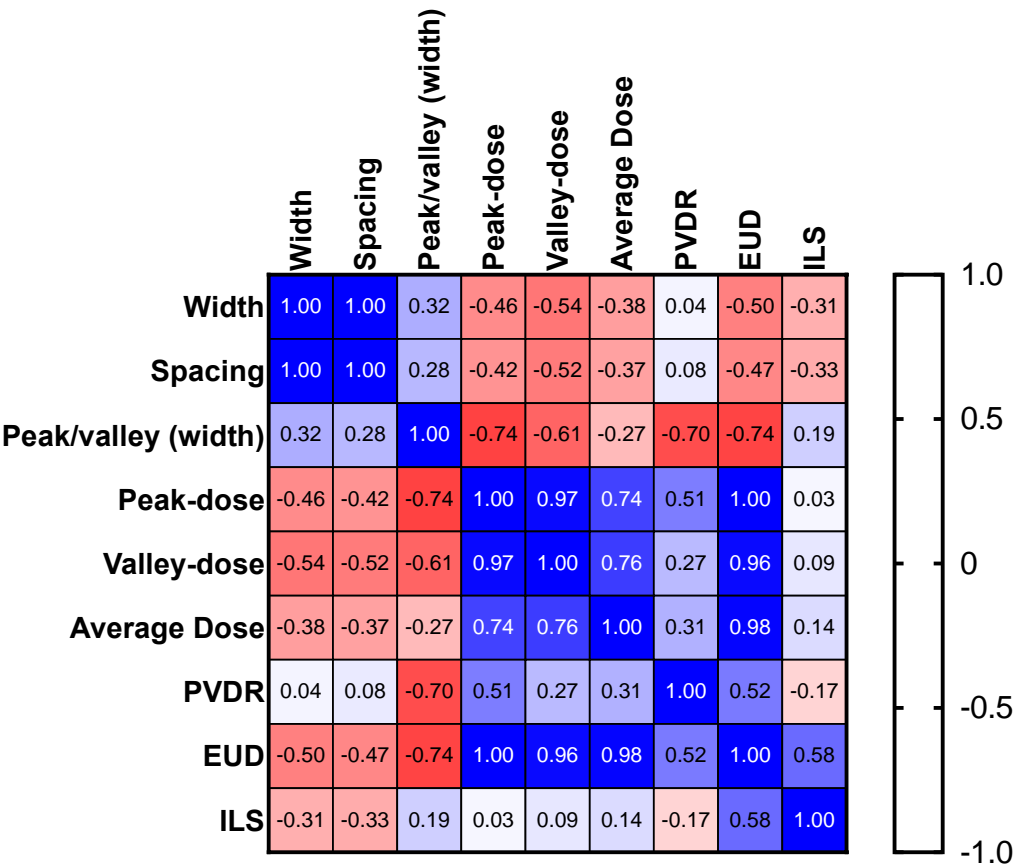

Correlation matrix of Photon MBRT
